# Supplementary material
Source: Springer Nature journal article supplement (https://www.springermedizin.de/resource/supplementary/12961_2012_264_MOESM10_ESM.docx/9570920)
Supplement: MOESM10 [file 9570920]

Figure 9

Figure 9. Estimated costs by stage for TB drugs ($)
